# Supplementary material for: Nudt21-mediated alternative polyadenylation of HMGA2 3′-UTR impairs stemness of human tendon stem cell
Source: publisher site journal article supplement (doi:10.18632/aging.103771), 2020-09-26
Supplement: Supplementary file [file aging-v12i18-103771-supplementary-material-SD1.pdf]

SUPPLEMENTARY FIGURE

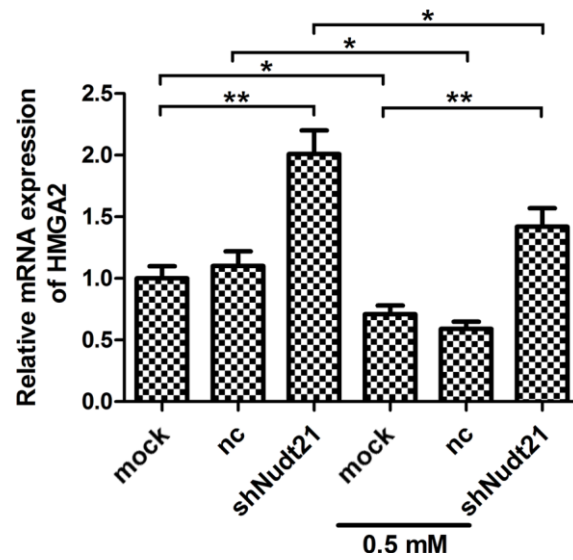

**Supplementary Figure 1. Relative gene expression of HMGA2.** hTSCs transfected with shNudt21-2 or a scrambled control shRNA (nc) were cultured in the presence or absence of 0.5 mM H<sub>2</sub>O<sub>2</sub> for 24 h. Untransfected cells (mock) were included for comparison. The mRNA levels of HMGA2 were detected by RT-PCR.
