# Supplementary material for: Nudt21-mediated alternative polyadenylation of HMGA2 3′-UTR impairs stemness of human tendon stem cell
Source: publisher site journal article supplement (doi:10.18632/aging.103771), 2020-09-26
Supplement: Supplementary file [file aging-v12i18-103771-supplementary-material-SD2.pdf]

## SUPPLEMENTARY FILE

### Supplementary File 1. Primer sequences for 3'-UTR analysis.

---

|                |                |          |                       |                         |
|----------------|----------------|----------|-----------------------|-------------------------|
| <b>qRT-PCR</b> | for figure 7a  |          |                       |                         |
|                | HMGA2          | proximal | forward               | AGGAAGCAGCAGCAAGAA      |
|                |                |          | reverse               | CTAAACCTGGGACTGTGAA     |
|                |                | distal   | forward               | ACCCAGGGGAAGACCCAAA     |
|                |                | reverse  | CCTCTTGGCCGTTTTTCTCCA |                         |
| <b>3'-RACE</b> | for figure 7b  |          |                       |                         |
|                |                |          | forward               |                         |
|                | HMGA2-distal   |          |                       | AGCTGGAAGGAAGTTGTTGAA   |
|                | HMGA2-proximal |          |                       | TGTACCATCAAAGCTTCAGAAGA |

---
